# Supplementary material for: Reduction Assessment of Agricultural Non-Point Source Pollutant Loading
Source: Copernicus journal article supplement (doi:10.5194/hess-2017-755), 2018-01-10
Supplement: Supplementary file [file hess-2017-755-AC2-supplement.pdf]

Dear editors,

We would like to submit the enclosed manuscript entitled “*Reduction Assessment of Agricultural Non-Point Source Pollutant Loading*” (hess-2017-755), which we wish to be considered for publication in “*Hydrology and Earth System Sciences (HESS)*”.

No conflict of interest exists in the submission of this manuscript, and manuscript is approved by all authors for publication. In this work, we evaluated the manuscript is a part of our present research achievement, and which is a good paper. I hope this paper is suitable for “HESS”. The main point our thesis wishes to address is to reflect on the practical application of and the solutions provided by the SWAT models in relation to China’s sparse hydrological basin information; to provide point by point model constructions; an explanation of our process; an analysis of our results, and the expansion of the utilization of the SWAT model from an advanced and disciplined perspective. SWAT was used to assess the reduction of agricultural NPS pollutant. Buffer zone of land use type could reflect the natural environment. 21.9% pollutant reduction under the EPS.

We have tried our best to revise the manuscript to hope to meet with approval. The manuscript has been thoroughly checked again and revised as suggested with the help of an English teacher. It is believed that the revised paper will be readable and could meet the standard generally for publication.

Thank you very much for your consideration and help. Looking forward to hearing from you soon.

Thank you very much for your time and consideration.

Yours sincerely,

Dr. Yicheng Fu

E-mail: [swfyc@126.com](mailto:swfyc@126.com)

+86-10-68781880 (office); +86-10-68572778 (fax)

Organization name: China Institute of Water Resources and Hydropower

Research (IWHR)

Organization address: A-1 Fuxing Road, Haidian District, 100038 Beijing

15<sup>th</sup>, Jan. 2018
